# Supplementary material
Source: Springer Nature journal article supplement (https://www.springermedizin.de/resource/supplementary/12943_2014_1350_MOESM1_ESM.pdf/9552778)
Supplement: MOESM1 [file 9552778]

**Additional file 1**

**Mitochondrial Hsp90s suppress calcium signals  
propagating from mitochondria to the ER in cancer cells**

Hye-Kyung Park, Ji-Eun Lee, Jaehwa Lim, and Byoung Heon Kang

Department of Biological Sciences, School of Life Sciences, UNIST, Ulsan, 689-798,  
Korea

## Supplementary Figure Legends

Figure S1. Drug effect on mitochondria.

(A) No elevation of cytosolic calcium on 17AAG treatment. Fura-2 loaded HeLa cells were treated with a non-targeted Hsp90 inhibitor, 17AAG, and analyzed using a fluorescence microscope.

(B) Gamitrinib effect on MCF10A. TMRM loaded MCF10A cells were treated with 30  $\mu$ M gamitrinib as indicated and analyzed by confocal microscope (left). Quantitation of the images (right). Data are mean  $\pm$  SEM from 40 ROIs. #, not significant; \*,  $p < 0.0001$ .

(C) Organelle specific effect of FCCP and Thap. TMRM loaded HeLa cells were treated with 10  $\mu$ M FCCP or 10  $\mu$ M Thap for 30 mins and analyzed by confocal microscope (left). Quantitation of the confocal microscope images (middle). Data are mean  $\pm$  SEM from 30 ROIs. #, not significant; \*,  $p < 0.0001$ . HeLa cells were treated with the drugs for 2 hours and analyzed by western blotting (right).

(D) Effect of 17AAG on the mitochondrial calcium store. mtCameleon was transiently expressed in HeLa cells. FRET images were acquired after 30  $\mu$ M 17AAG treatment at the indicated time intervals (left) and the FRET ratio was calculated and plotted (right). Data are the mean  $\pm$  SEM calculated from 30 cells in two independent experiments. Bar, 10  $\mu$ m. R.U., relative units.

Figure S2. Inhibition of mitochondrial Hsp90s activates ER stress sensors

(A) XBP1 splicing by silencing TRAP1. HeLa cells were treated with two different TRAP1 siRNAs for 24 hours. mRNA expression levels of XBP1 splicing variants, TRAP1, and GAPDH were analyzed by RT-PCR.

(B) eIF2 $\alpha$  phosphorylation upon TRAP1 silencing. After treatment of HeLa cells with two different TRAP1 siRNAs, the expression levels of eIF2 $\alpha$ , phospho-eIF2 $\alpha$  (p-eIF2 $\alpha$ ), TRAP1, and  $\beta$ -actin were analyzed by western blotting.

(C) XBP1 splicing upon mitochondrial Hsp90 inhibition. After treatment with 30  $\mu$ M gamitrinib for 2 hours, mRNA expression levels of XBP1 splicing variants, TRAP1, and GAPDH mRNAs were analyzed by RT-PCR.

(D) Analysis of CHOP mRNA. HeLa cells were treated with 30  $\mu$ M gamitrinib or TRAP1 siRNAs as indicated. CHOP and GAPDH mRNAs were analyzed by RT-PCR.

Figure S3. IP<sub>3</sub> receptors and lysophosphatidic acid (LPA)-induced calcium flux.

(A) Silencing of IP<sub>3</sub>R isotypes. HeLa cells were treated with IP<sub>3</sub>R1-, IP<sub>3</sub>R2-, and IP<sub>3</sub>R3-specific siRNAs, and analyzed by Western blotting.

(B) IP<sub>3</sub>R1 silencing blocked LPA-induced calcium flux. HeLa cells were treated with IP<sub>3</sub>R1 siRNA and labeled with Fura-2. After LPA treatment, cytoplasmic calcium flux was monitored as in Fig S1A. Data are the mean  $\pm$  SEM calculated from 20 ROIs in two independent experiments.

Figure S4. Sensitization of cancer cells to thapsigargin by mitochondrial Hsp90 inhibition.

Knockdown of TRAP1 by siRNA. After silencing of TRAP1 in HeLa and 22Rv1 cells with TRAP1-#1 siRNA, cells were treated with various concentrations of Thap for 24 hours and analyzed by the MTT assay. Data are from three independent duplicate experiments; data are given in terms of mean  $\pm$  SEM.

Figure S5. Death receptor 5 (DR5) and reactive oxygen species (ROS) in the drug

combination

(A) DR5 expression and caspase-8 activation. 22Rv1 cells were treated with 2.5  $\mu$ M gamitrinib and 0.06  $\mu$ M Thap as indicated for 24 hours, then analyzed by reverse transcription (RT)-PCR and western blotting.

(B) ROS do not affect gamitrinib-induced calcium release. Fura-2 loaded 22Rv1 cells were incubated with 30 mM N-acetylcysteine (NAC) or 30  $\mu$ M manganese (III) tetrakis (1-methyl-4-pyridyl) porphyrin pentachloride (MnTMPyP) for 1 hour and then treated with 30  $\mu$ M gamitrinib for 2 hours before being analyzed by the fluorescence microscope.

(C) ROS scavenger effect on CHOP induction. 22Rv1 cells were treated with 20  $\mu$ M gamitrinib in the presence or absence of 20  $\mu$ M MnTMPyP for 8 hours and analyzed by western blotting (left). Similarly, the cells were treated with 0.5 mM ascorbic acid, 0.5 mM 2,2,6,6 tetramethylpiperidine 1-oxyl (TEMPO), and 20  $\mu$ M pyrrolidine dithiocarbamate (PDTC) for 8 hours and analyzed by western blotting (right).

Figure S6. Effect of combination drug treatment on normal tissues

(A) Gamitrinib and Thap treatment in astrocytes. Astrocytes were treated with 10  $\mu$ M Thap or 30  $\mu$ M gamitrinib for 4 hours and 1  $\mu$ M Thap or 2.5  $\mu$ M gamitrinib for 24 hours, and analyzed by western blotting.

(B) Hematoxylin and eosin staining. The animals were sacrificed at the end of the experiment, and organs were collected, fixed, stained, and analyzed under a light microscope.

(C) Mouse body weight change. Prior to sacrificing the animals in the xenograft experiment, their body weights were measured. Data are mean  $\pm$  SEM.

(D) Analysis of CHOP expression in mouse brain. Brain samples from sacrificed mice

(total 8 mice) were analyzed by western blotting.

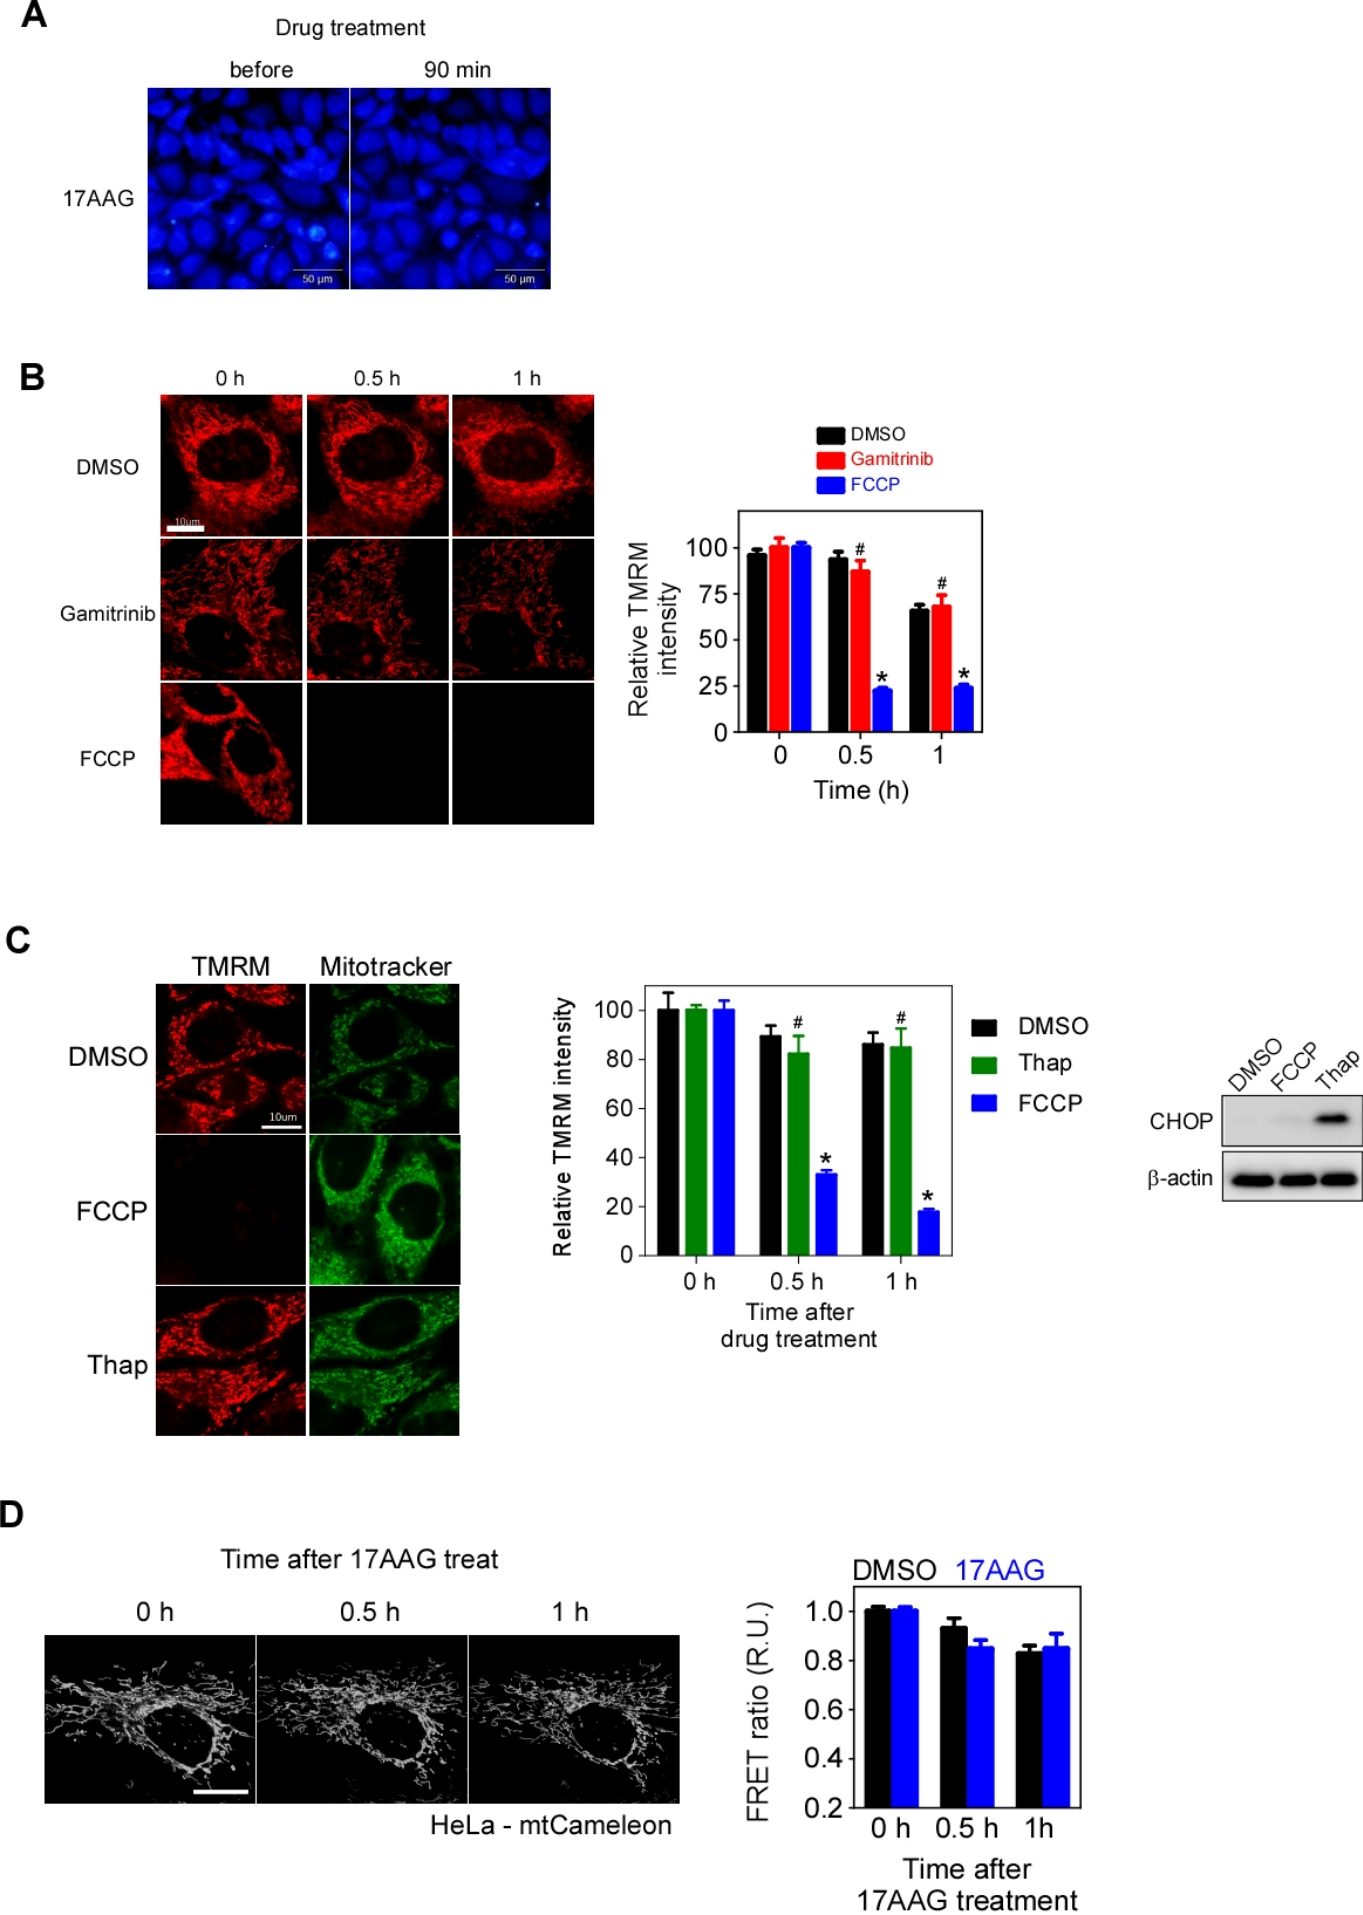

Figure S1

**A**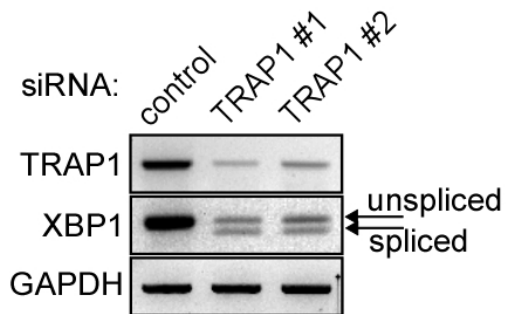**B**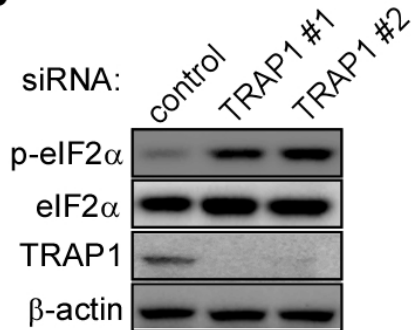**C**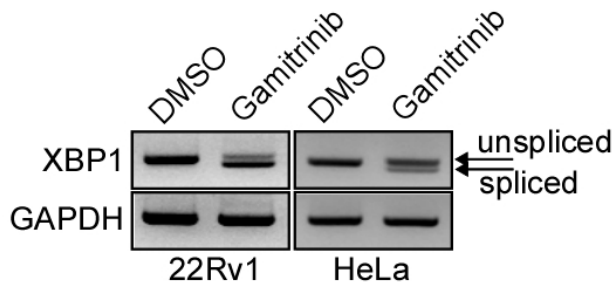**D**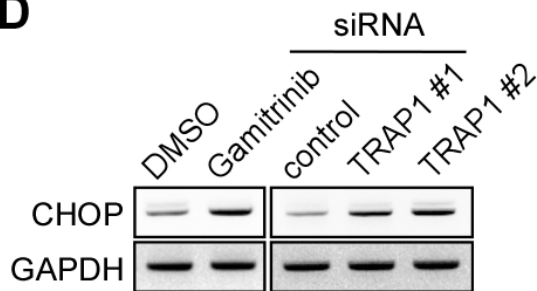

Figure S2

**A**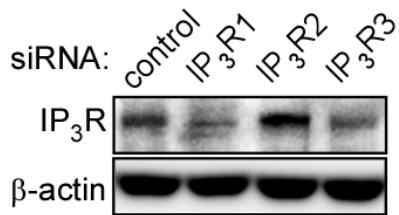**B**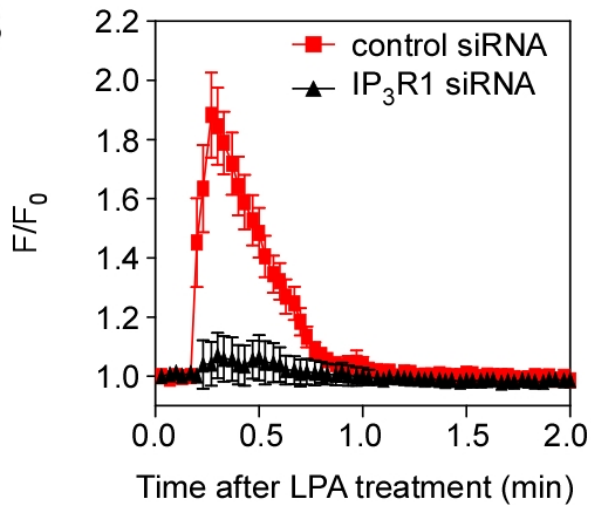

Figure S3



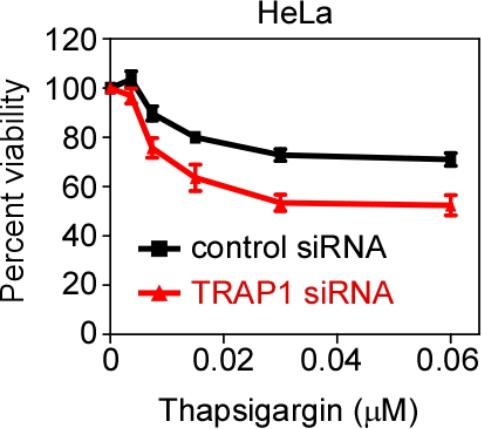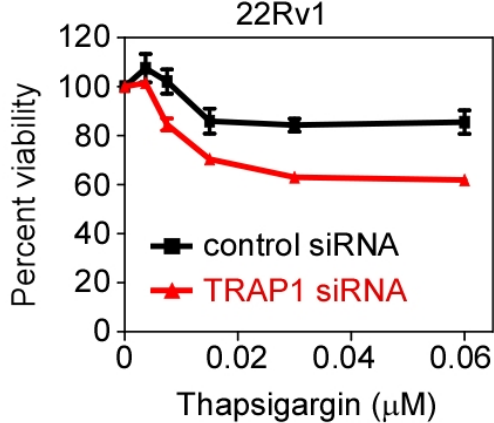

Figure S4

**A**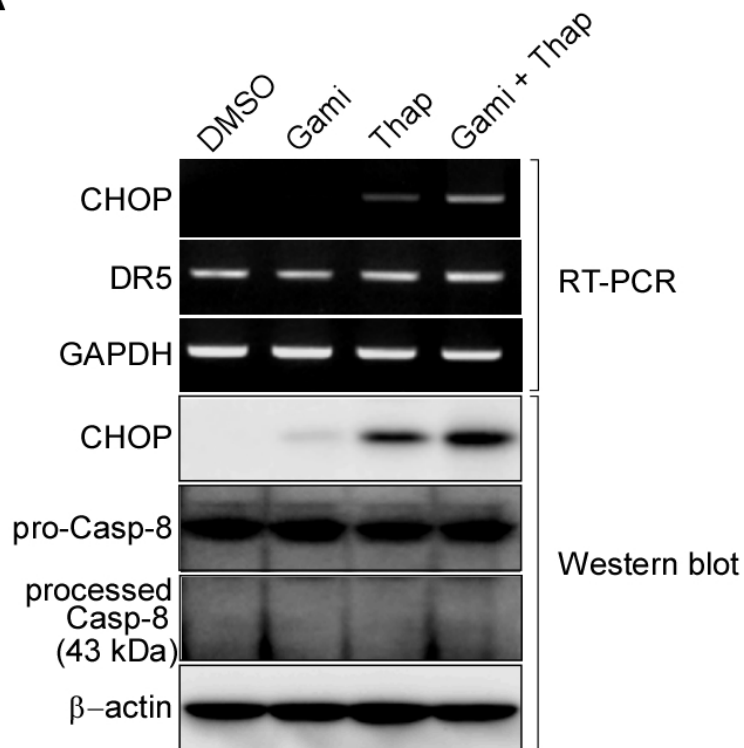**B**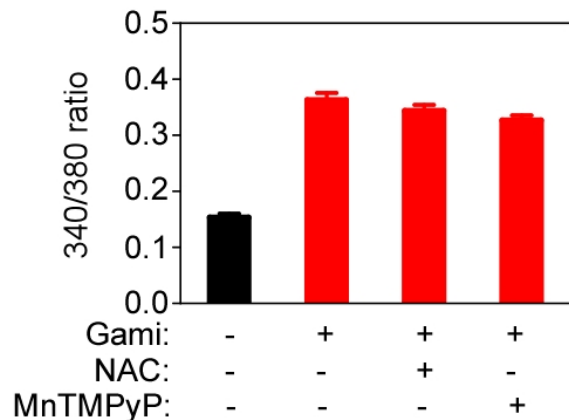**C**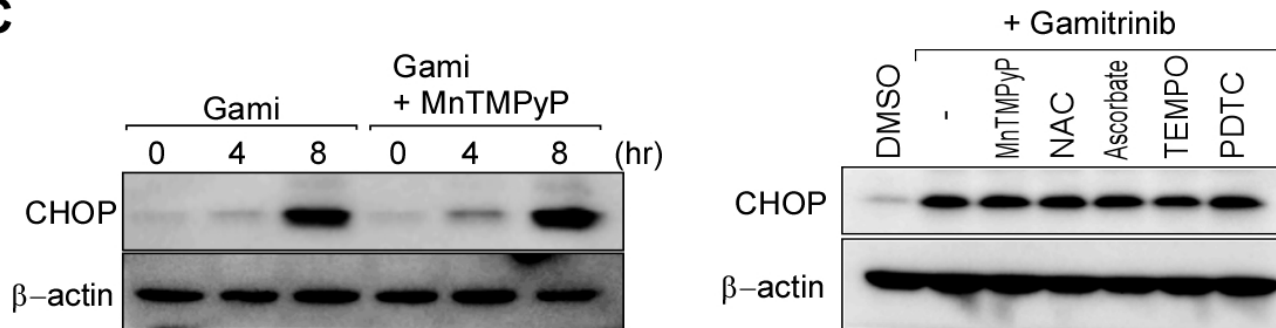

Figure S5

**A**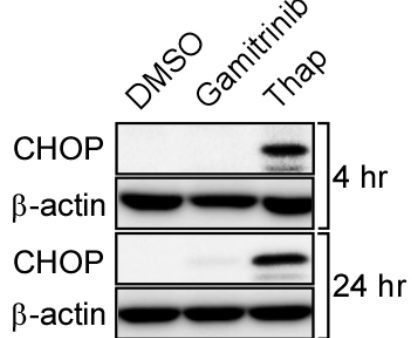**C**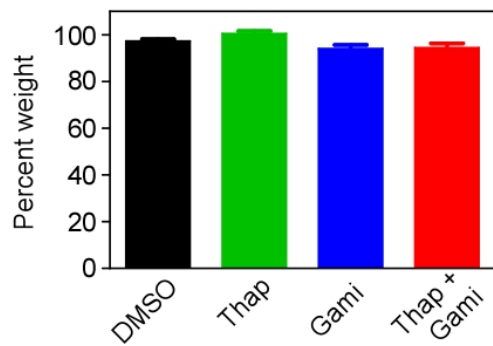**D**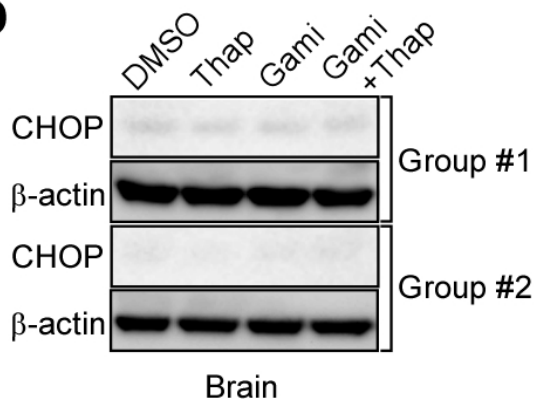**B**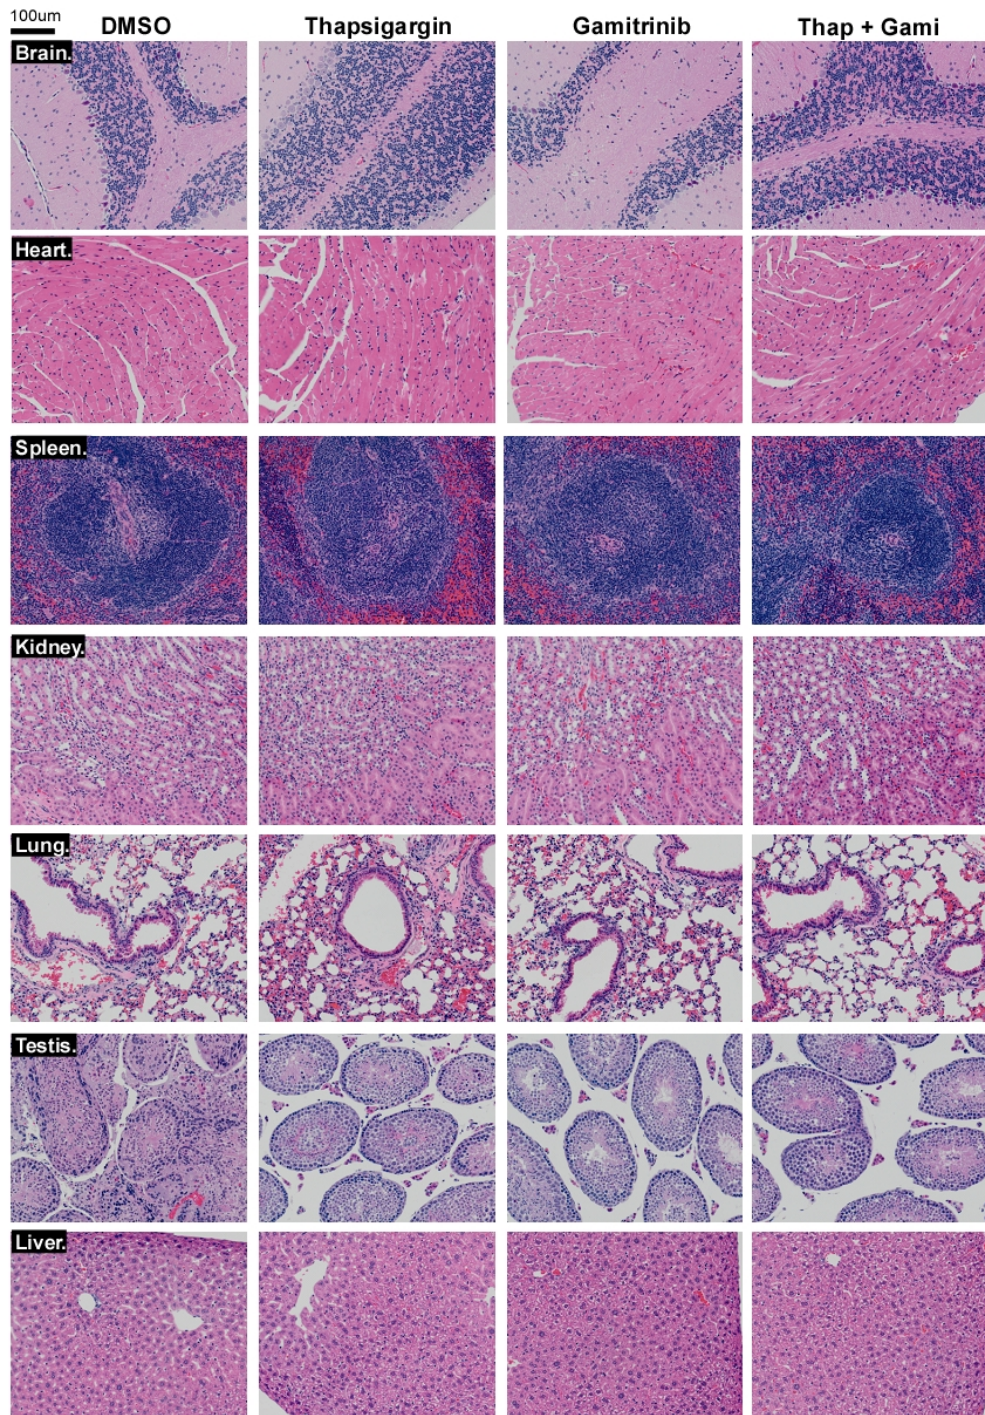

Figure S6
